# Supplementary material for: Scalable graphene synthesised by plasma-assisted selective reaction on silicon carbide for device applications
Source: Royal Society of Chemistry journal article supplement (doi:10.1039/c4nr04486j), 2014-09-12
Supplement: c4nr04486j1.pdf [file c4nr04486j1.pdf]

## Supplementary Information

### **Scalable Graphene Synthesized by Plasma-Assisted Selective Reaction Process on Silicon Carbide for Device Application**

Hsu-Sheng Tsai<sup>1</sup>, Chih-Chung Lai<sup>1</sup>, Henry Medina<sup>1</sup>, Shih-Ming Lin<sup>1</sup>, Yu-Chuan Shih<sup>1</sup>, Yu-Ze Chen<sup>1</sup>, Jenq-Horng Liang<sup>2</sup>, and Yu-Lun Chueh<sup>1,\*</sup>

<sup>1</sup> *Department of Material Science and Engineering, National Tsing Hua University, Hsinchu 30013, Taiwan*

<sup>2</sup> *Department of Engineering and System Science and Institute of Nuclear Engineering and Science, National Tsing Hua University, Hsinchu 30013, Taiwan*

*\*Corresponding author: ylchueh@mx.nthu.edu.tw*

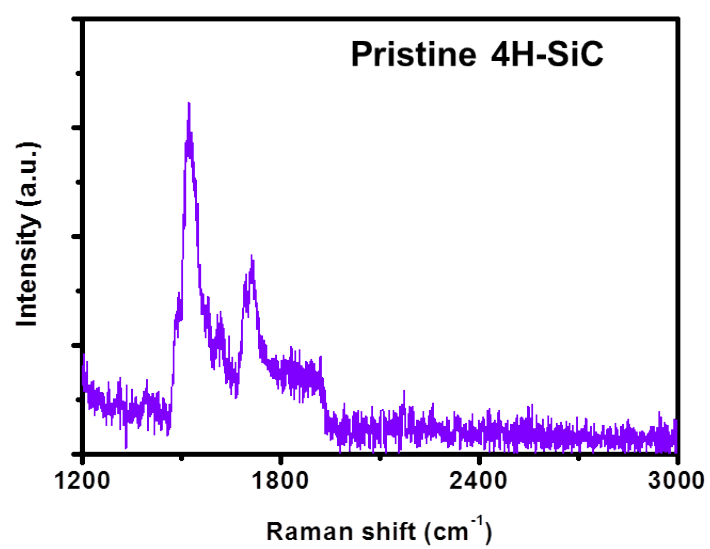

**Supplementary Figure 1 Raman spectrum.** Raman spectrum of pristine 4H-SiC.

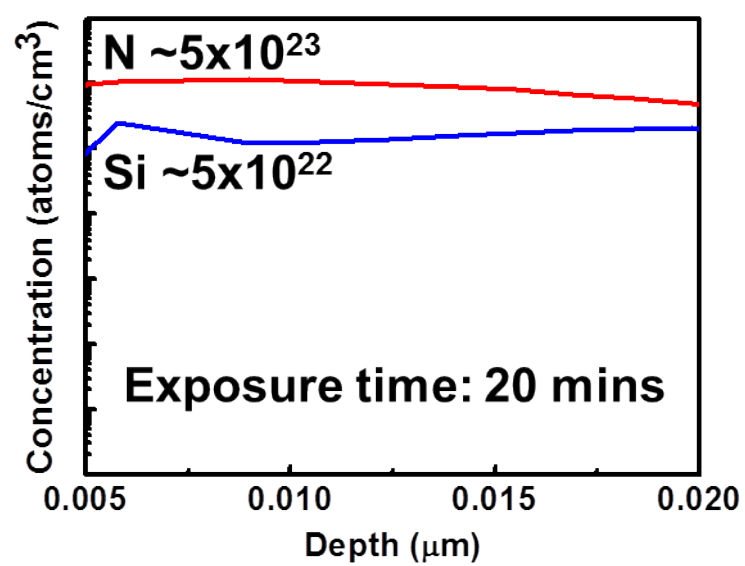

**Supplementary Figure 2 SIMS depth concentration profile.** The depth concentration of nitrogen in Si substrate.

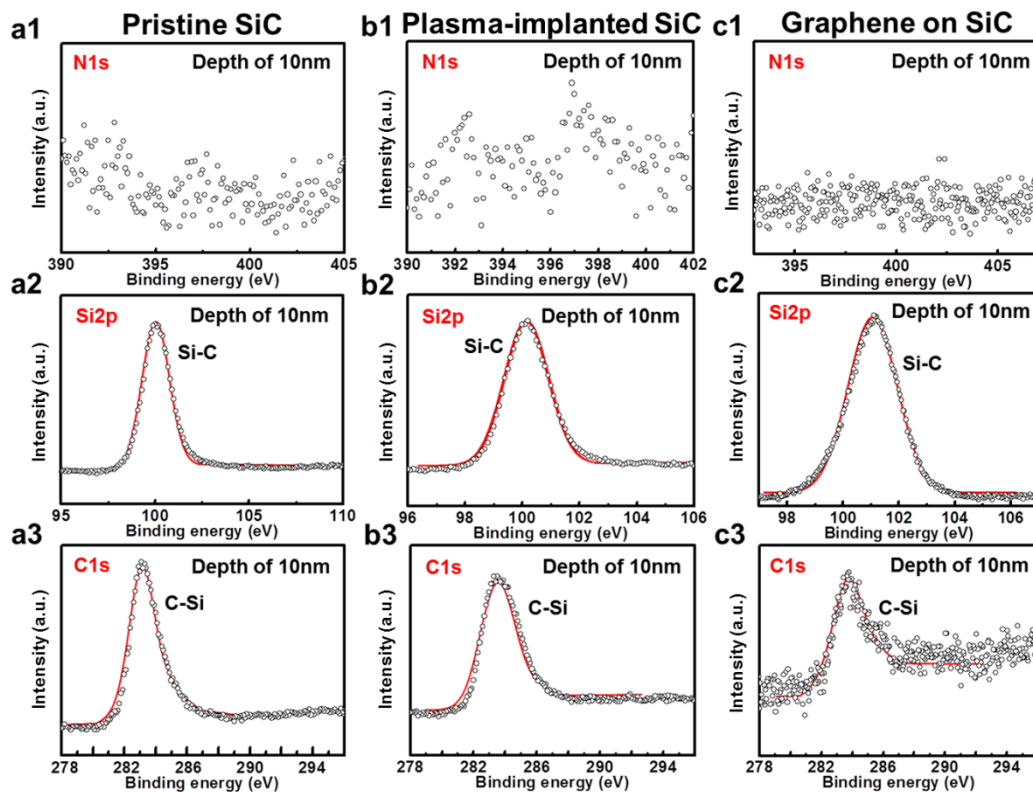

**Supplementary Figure 3 XPS spectra of 10 nm-depth below the surface. a,** N1s (a1), Si2p (a2), and C1s (a3) spectra of pristine SiC. **b,** N1s (b1), Si2p (b2), and C1s (b3) spectra of plasma-implanted SiC. **c,** N1s (c1), Si2p (c2), and C1s (c3) spectra of graphene on SiC.

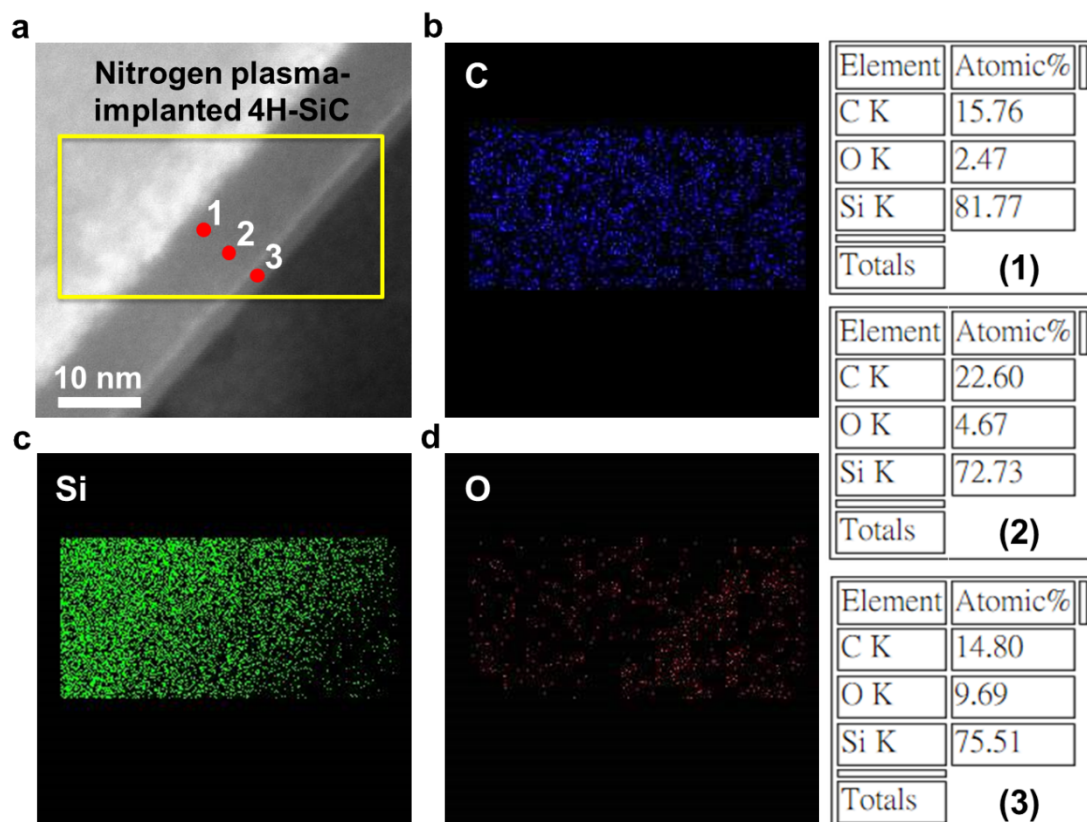

**Supplementary Figure 4 TEM observation and EDS mapping.** **a**, Cross-sectional TEM image of plasma-implanted SiC and the red dots indicate the depth of EDS line-scan. **b**, C EDS mapping of the area within yellow frame in **a**. **c**, Si EDS mapping of the area within yellow frame in **a**. **d**, O EDS mapping of the area within yellow frame in **a**.

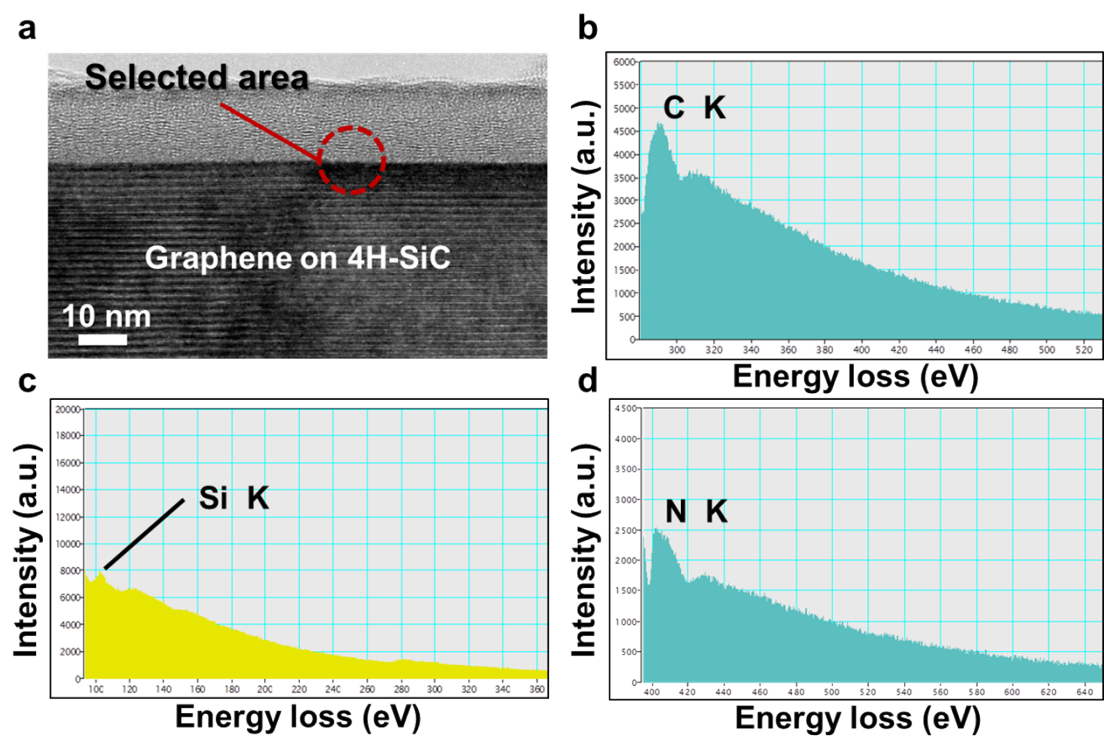

**Supplementary Figure 5 TEM observation and EELS spectra.** **a**, Cross-sectional TEM image of graphene on SiC and the red circle indicates the selected area. **b**, C K-edge EELS spectrum of the region within red circle in **a**. **c**, Si K-edge EELS spectrum of the region within red circle in **a**. **d**, N K-edge EELS spectrum of the region within red circle in **a**.

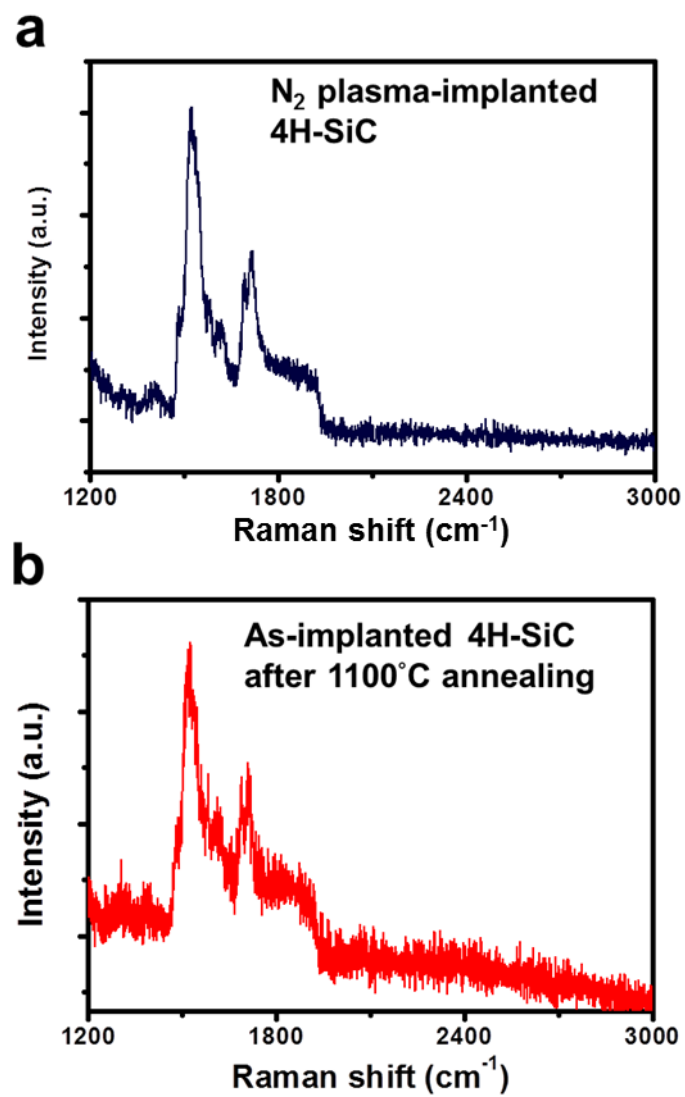

**Supplementary Figure 6 Raman spectra. a,** Raman spectrum of plasma-implanted 4H-SiC. **b,** Raman spectrum of plasma-implanted 4H-SiC after 1100°C annealing.

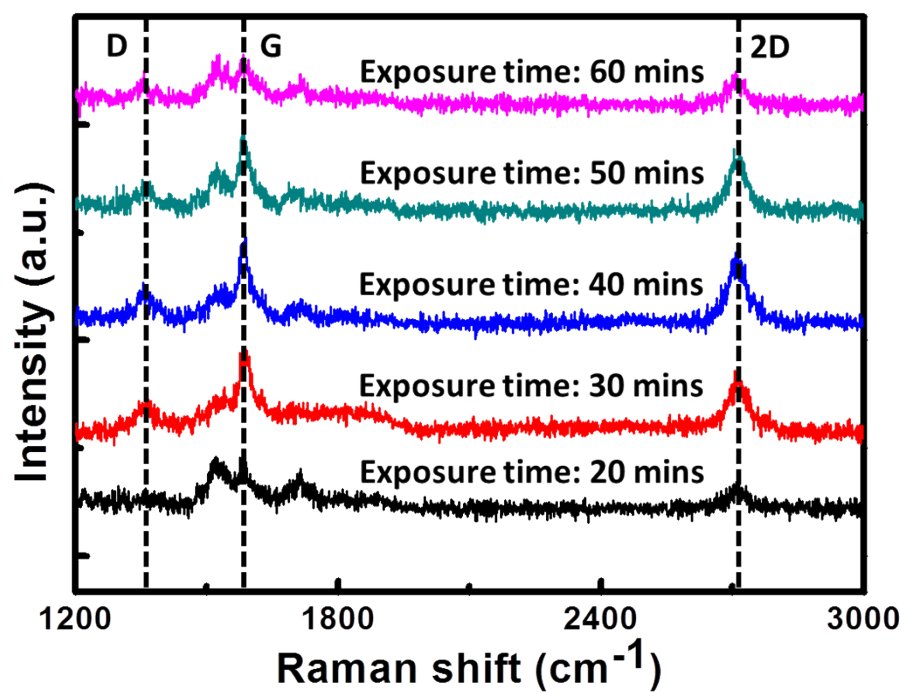

**Supplementary Figure 7 Raman spectra.** Raman spectra of graphene obtained by PSR process with different plasma exposure times.

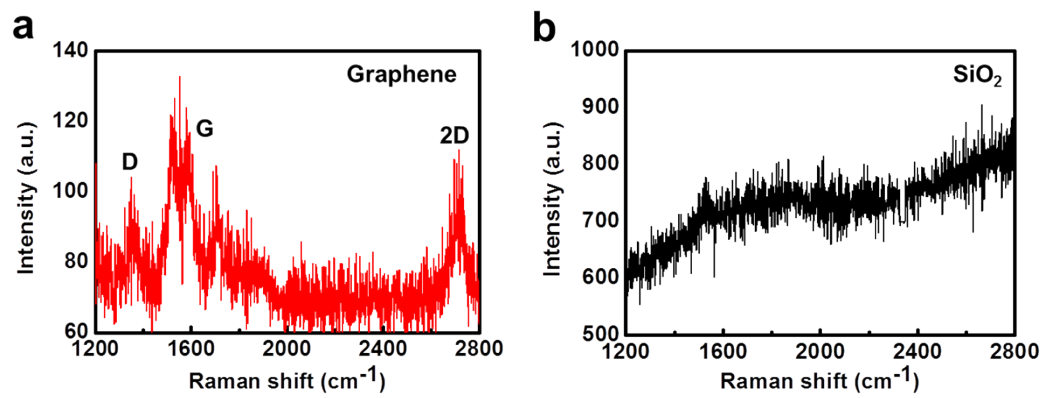

**Supplementary Figure 8 Raman spectra.** **a**, Raman spectrum of patterned graphene on SiC. **b**, Raman spectrum of patterned SiO<sub>2</sub> on SiC.

**a**

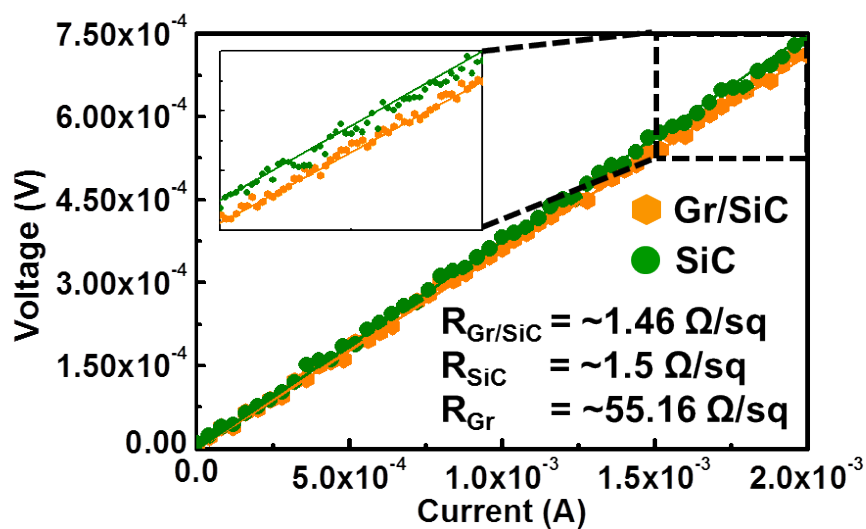

**b**

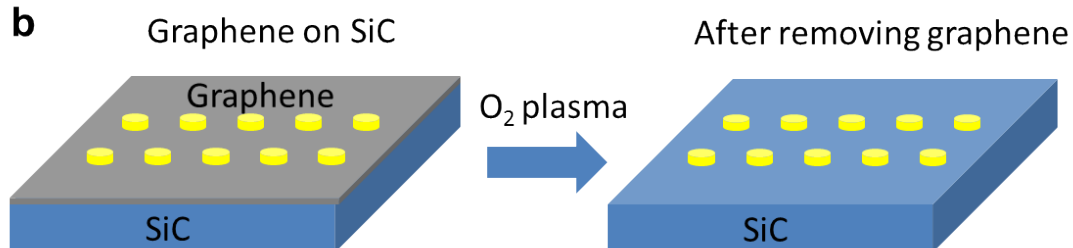

**Supplementary Figure 9 Four-probe measurement. a**, I-V behavior of graphene on SiC and pure SiC after removal of graphene. **b**, schematic of the process for removing graphene.

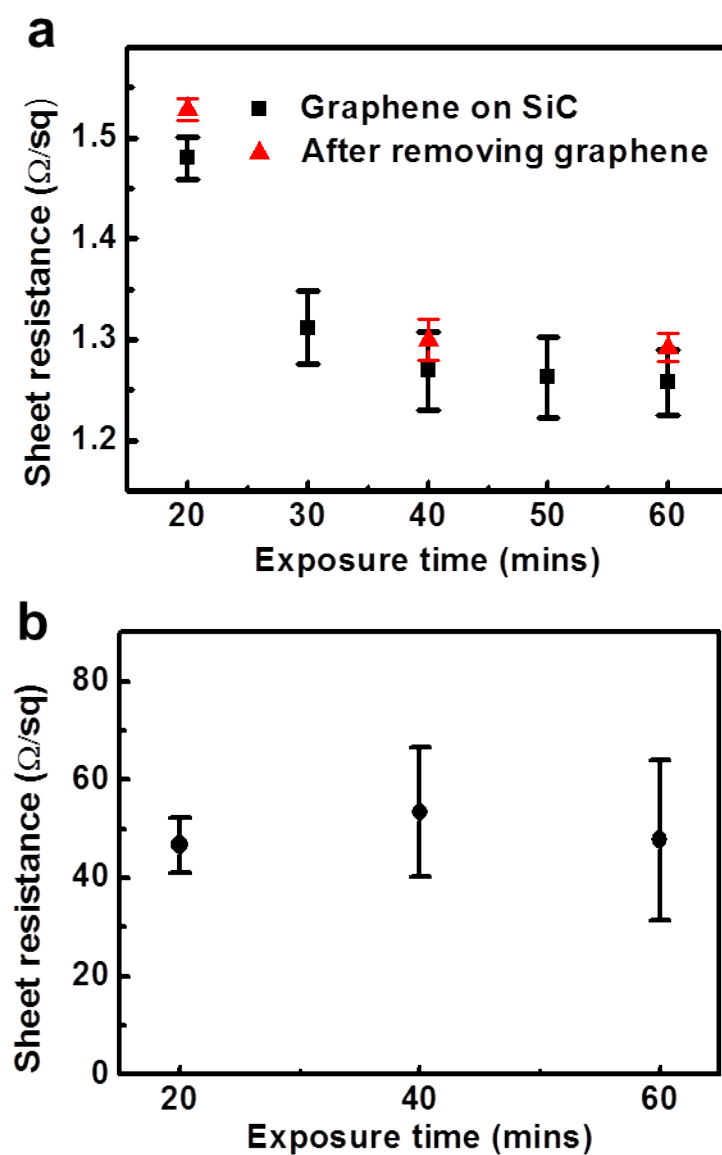

**Supplementary Figure 10 Sheet resistance.** **a**, sheet resistances of SiC after the PSR process with different plasma exposure times before and after removal of graphene. **b**, Estimated sheet resistances of graphene films extrated from **a**.

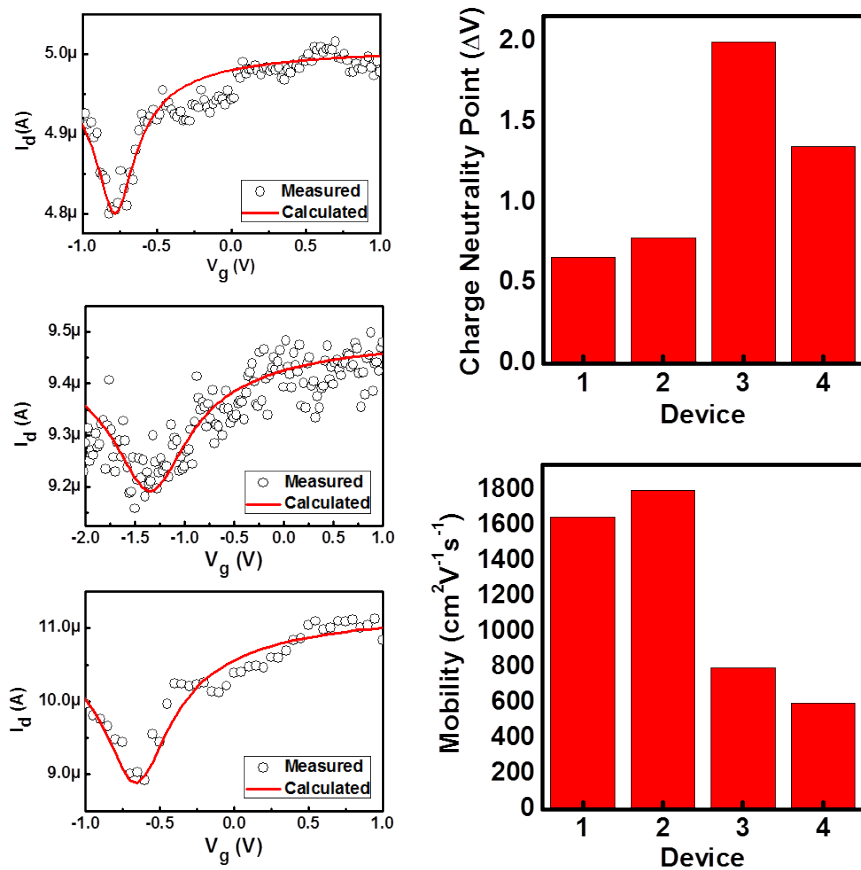

**Supplementary Figure 11 Device characteristics.**  $I_{ds}$ - $V_g$  behavior of graphene FETs on SiC and the statistical results of mobility and charge neutrality point.
